# Supplementary material
Source: PubMed Central journal article supplement (PMC2752374)

**Figure S1: . Performance of control female siblings of males shown in Figure 3.** The performance index for each genotype [*rut*<sup>2080</sup>/+; UAS-*rut*/+], [*rut*<sup>2080</sup>/+; 247/UAS-*rut*], [*rut*<sup>2080</sup>/+; C309/+; UAS-*rut*/+],[*rut*<sup>2080</sup>/+; UAS-*rut*/+; OK107/+] and [*rut*<sup>2080</sup>/Y; UAS-*rut*/+] is shown for immediate memory (a) and 3 hour memory (b) after a single training session, and 24 hour memory after massed (c) and spaced training (d). In each case, the addition of a single Gal4 Driver does significantly improve performance of [*rut*<sup>2080</sup>/+; UAS-*rut*/+] control heterozygous females. All groups in this figure were trained and tested in parallel with the male siblings in Fig 3, a-d respectively.

**Figure S2: . STM Performance of female *rut*<sup>2080</sup>;UAS-*rut* heterozygous animals and females heterozygous for *rut*<sup>2080</sup>, lobe specific MB Gal4 drivers, and the UAS-*rut*+ transgene.** The performance index for each genotype [*rut*<sup>2080</sup>/+; UAS-*rut*/+], [*rut*<sup>2080</sup>/+; C305a/+; UAS-*rut*/+], [*rut*<sup>2080</sup>/+; 201Y/+; UAS-*rut*/+],[*rut*<sup>2080</sup>/+; GH146/+; UAS-*rut*/+] [*rut*<sup>2080</sup>/+; C739/+; UAS-*rut*/+], and [*rut*<sup>2080</sup>/Y; UAS-*rut*/+] is shown for immediate memory and 3 hour memory after a single training session. In each case, the addition of a single Gal4 Driver does significantly improve performance of [*rut*<sup>2080</sup>/+; UAS-*rut*/+] control heterozygous females.

**Figure S3: . 24 Hour memory Performance of female *rut*<sup>2080</sup>;UAS-*rut* heterozygous animals and females heterozygous for *rut*<sup>2080</sup>, lobe specific MB Gal4 drivers, and the UAS-*rut*+ transgene.** The performance index for each genotype [*rut*<sup>2080</sup>/+; UAS-*rut*/+], [*rut*<sup>2080</sup>/+; C305a/+; UAS-*rut*/+], [*rut*<sup>2080</sup>/+; 201Y/+; UAS-*rut*/+],[*rut*<sup>2080</sup>/+; GH146/+; UAS-*rut*/+] [*rut*<sup>2080</sup>/+; C739/+; UAS-*rut*/+], and [*rut*<sup>2080</sup>/Y; UAS-*rut*/+] is shown for

memory 24 hour memory after massed (a,b) and spaced training (c,d). In each case, the addition of a single Gal4 Driver does significantly improve performance of [*rut*<sup>2080</sup>/+; UAS-*rut*/+] control heterozygous females.

**Figure S4: Performance of female *rut*<sup>2080</sup>;UAS-*rut* heterozygous animals and females heterozygous for *rut*<sup>2080</sup>, the UAS-*rut*+ transgene, and Gal4 drivers 201Y and C739 alone or in combination.** The performance index for each genotype [*rut*<sup>2080</sup>/+; UAS-*rut*/+], [*rut*<sup>2080</sup>/+; C739/+; UAS-*rut*/+], [*rut*<sup>2080</sup>/+; 201Y/+; UAS-*rut*/+], [*rut*<sup>2080</sup>/+; C739/201Y; UAS-*rut*/+], and [*rut*<sup>2080</sup>/Y; UAS-*rut*/+] is shown for immediate memory (a) and 3 hour memory (b) after a single training session, and 24 hour memory after massed (c) and spaced training (d). For immediate, 3 hour, and 24 hour memory after massed training, females heterozygous for both *rut*<sup>2080</sup> and either one or both Gal4 drivers show no significant increases in performance relative to female *rut*<sup>2080</sup> heterozygous controls. However, in the case of 24 hour memory after spaced training, females heterozygous for *rut*<sup>2080</sup> and both 201Y and c739 Gal4 drivers show significantly higher performance compared to female *rut*<sup>2080</sup> heterozygous controls. P <0.05.

**Figure S5: Immediate Memory after spaced training in *rut* mutant animals.** The performance index for each genotype [*rut*<sup>2080</sup>/+; UAS-*rut*/+] and [*rut*<sup>2080</sup>/Y; UAS-*rut*/+] is shown for immediate memory after spaced training. While displaying significantly lower performance compared to female *rut*<sup>2080</sup> heterozygous controls, [*rut*<sup>2080</sup>/Y; UAS-*rut*/+] animals still show residual *rut* independent memory.

**Figure S6: Performance of female  $rut^{2080}$ ;UAS-rut heterozygous animals and females heterozygous for  $rut^{2080}$ , the UAS-rut+ transgene, and Gal4 drivers 201Y alone or 201Y and C305a or 201Y and C739 in combination.** The performance index for each genotype [ $rut^{2080}/+$ ; UAS-rut/+], [ $rut^{2080}/+$ ; 201Y/+; UAS-rut/+], [ $rut^{2080}/+$ ; C305a/201Y; UAS-rut/+] [ $rut^{2080}/+$ ; C739/201Y; UAS-rut/+], and [ $rut^{2080}/Y$ ; UAS-rut/+] is shown for 24 hour memory after spaced training. In each case, the addition of a single Gal4 Driver, or two Gal4 drivers does significantly improve performance of [ $rut^{2080}/+$ ; UAS-rut/+] control heterozygous females.

Figure S1

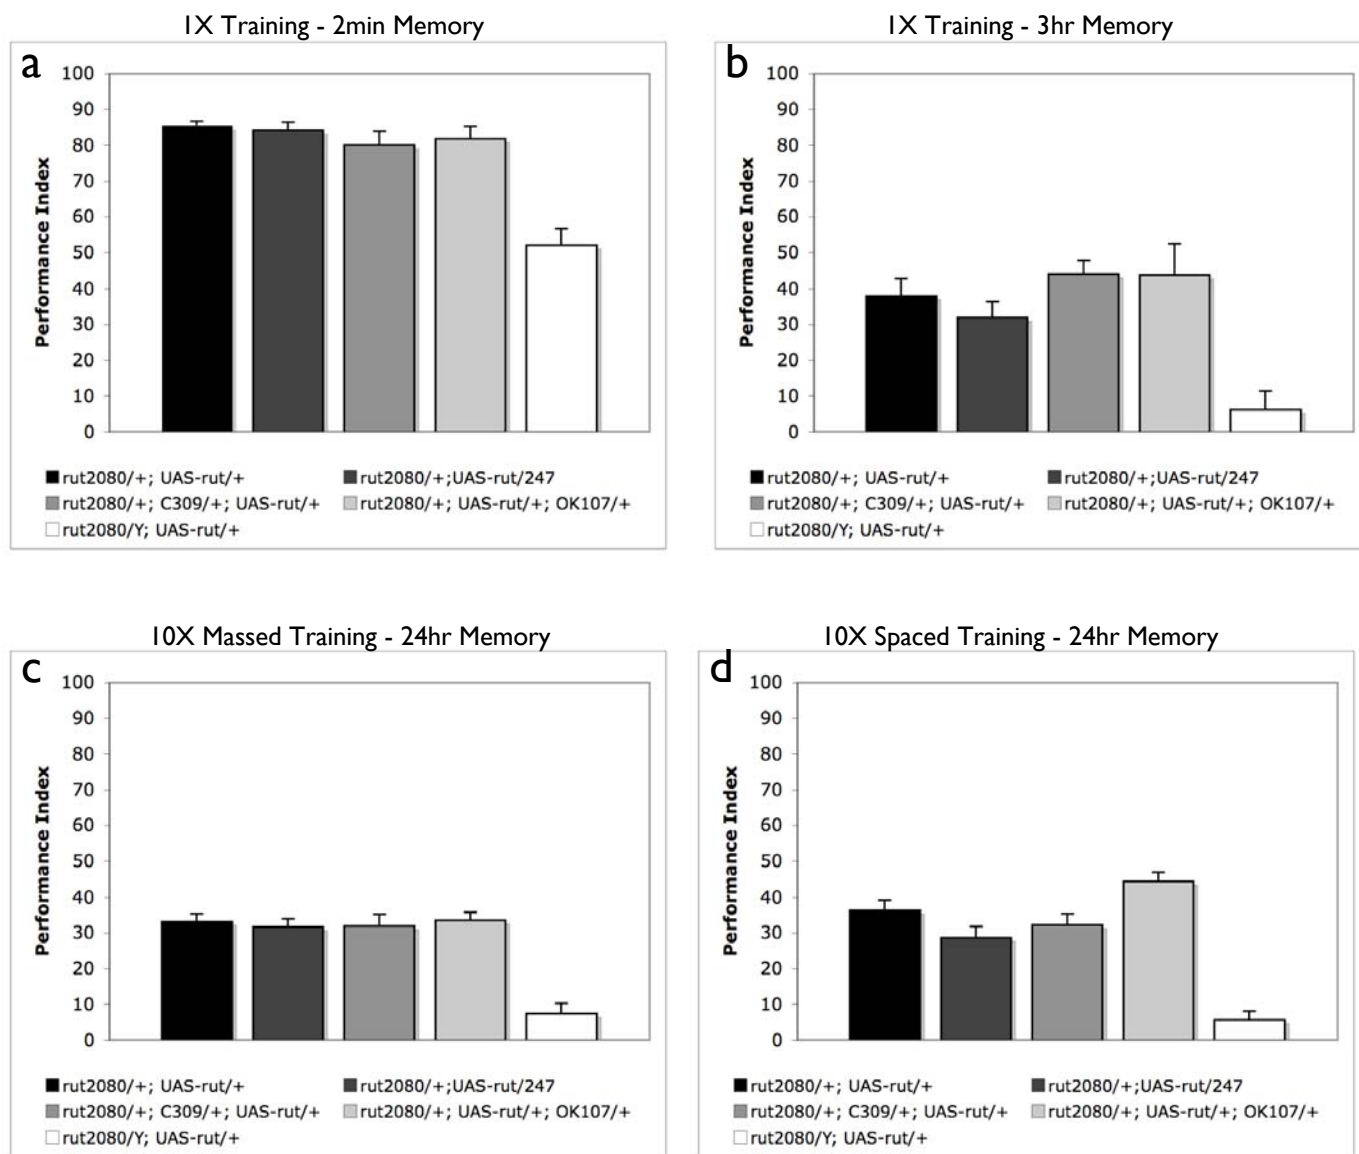

Figure S2

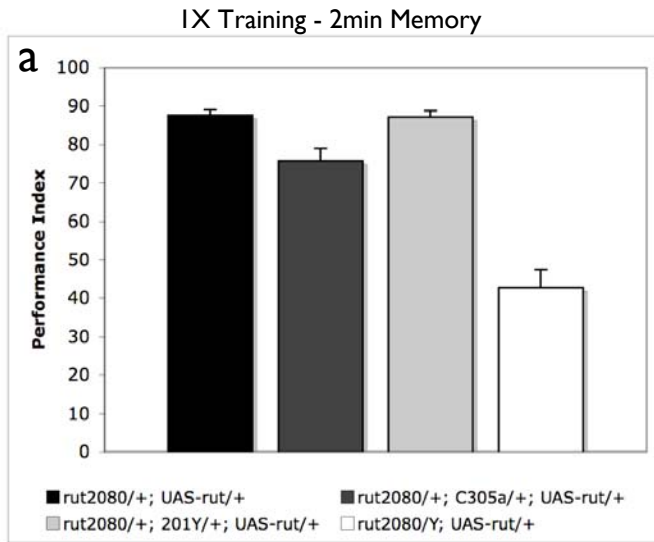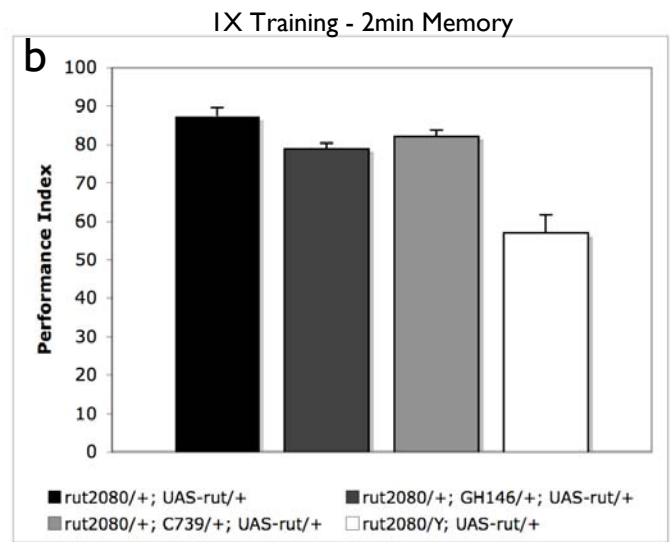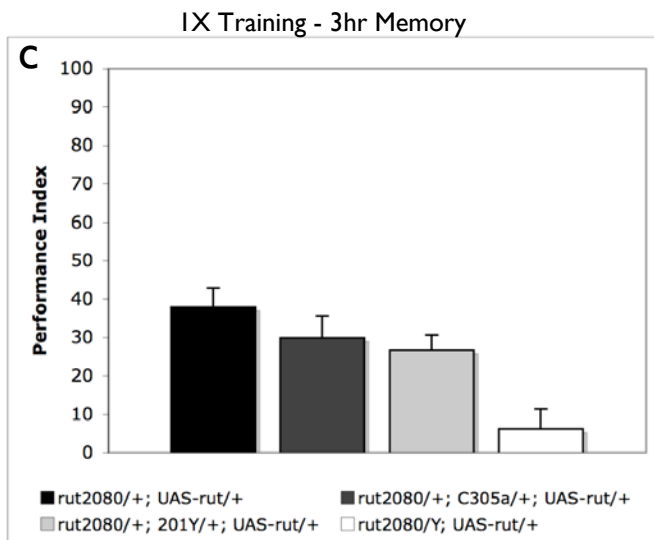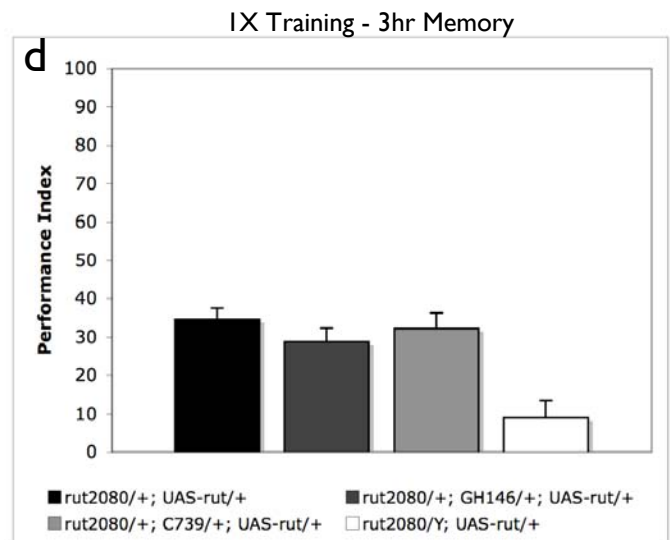

Figure S3

10X Massed Training - 24hr Memory

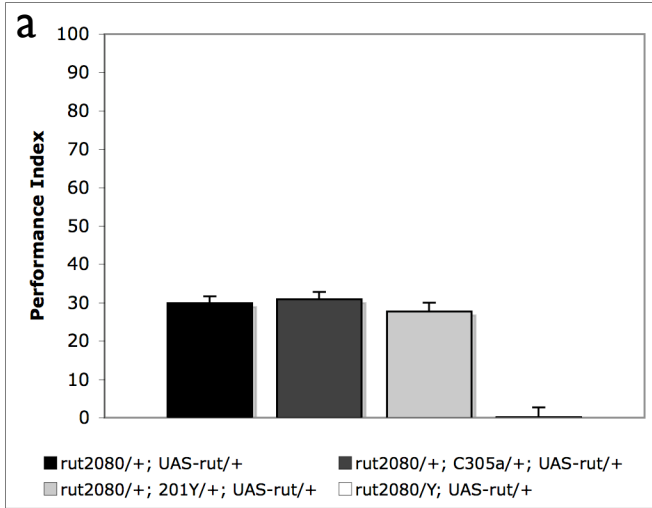

10X Massed Training - 24hr Memory

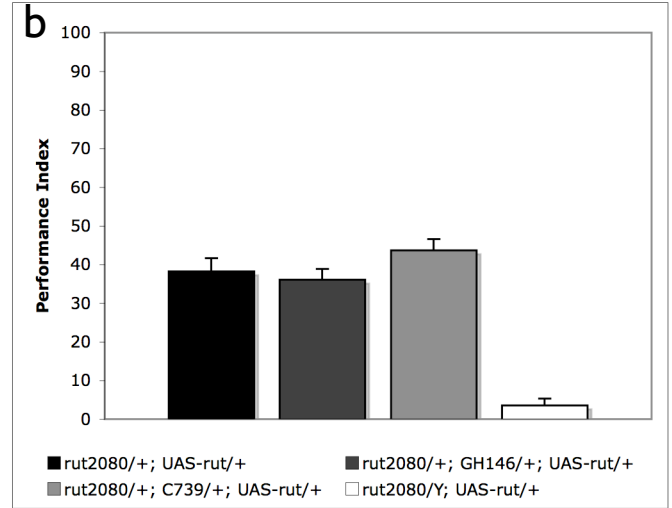

10X Spaced Training - 24hr Memory

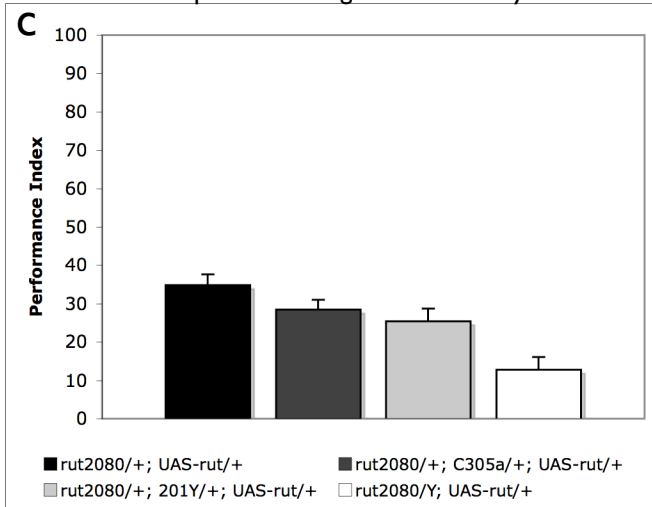

10X Spaced Training - 24hr Memory

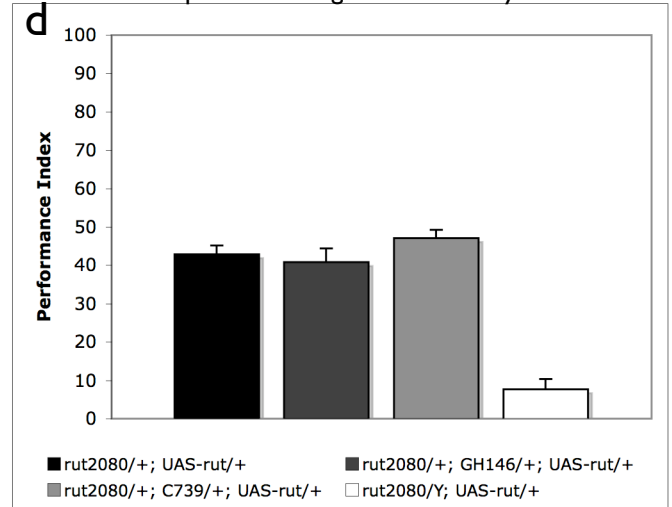

Figure S4

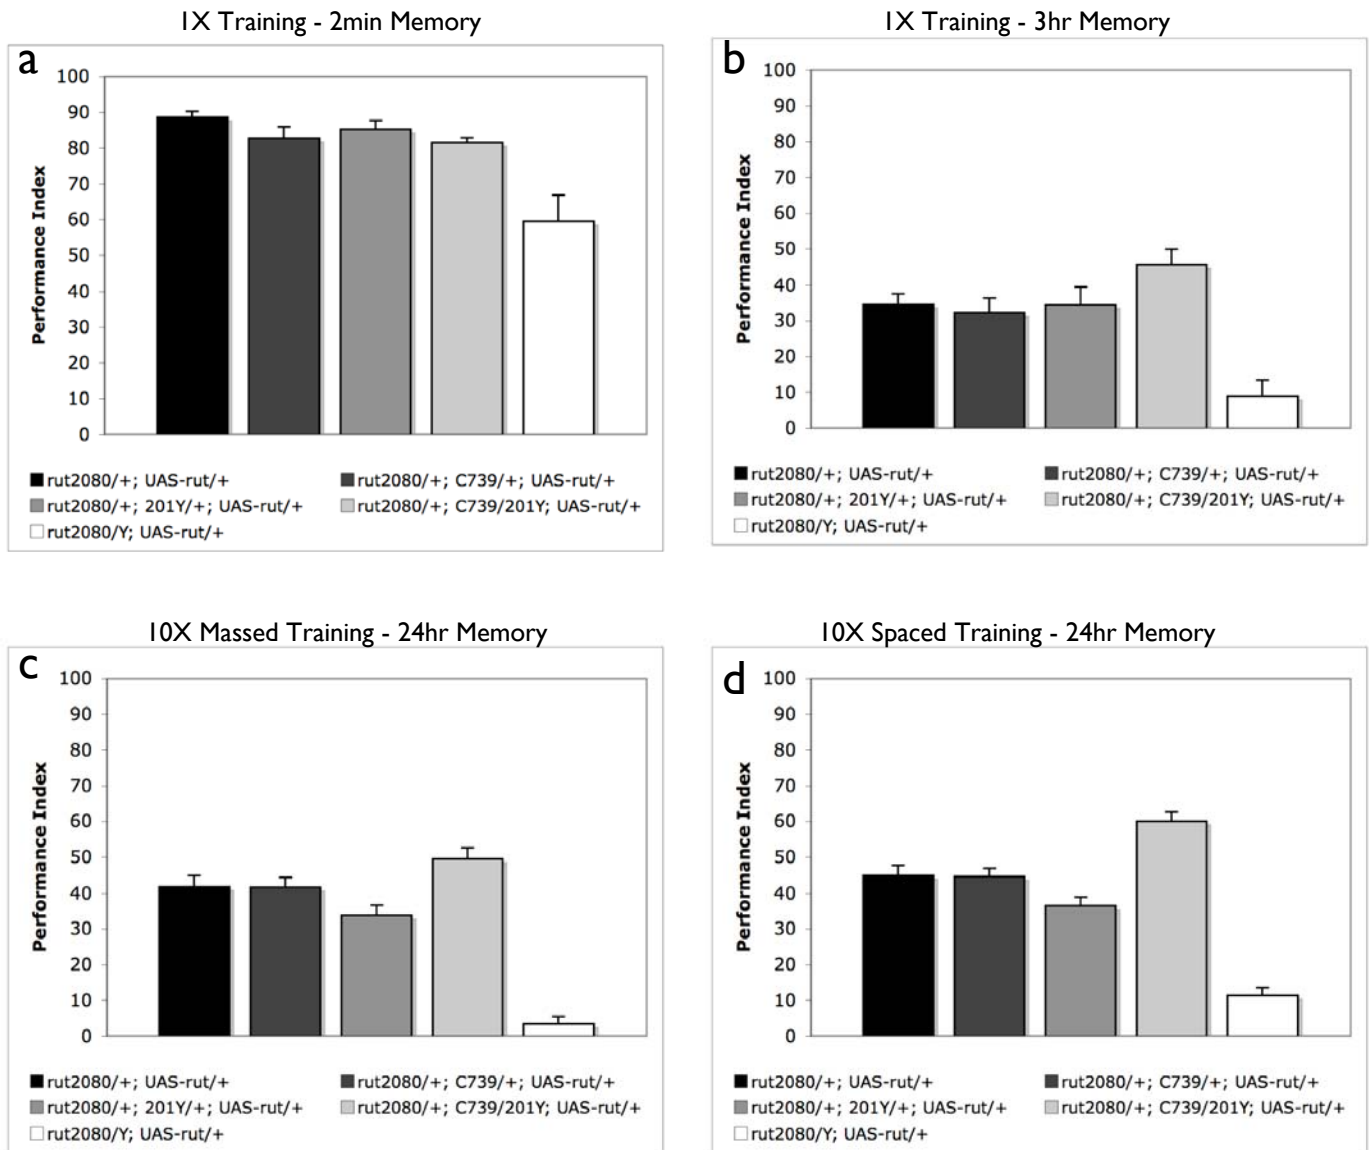

Figure S5

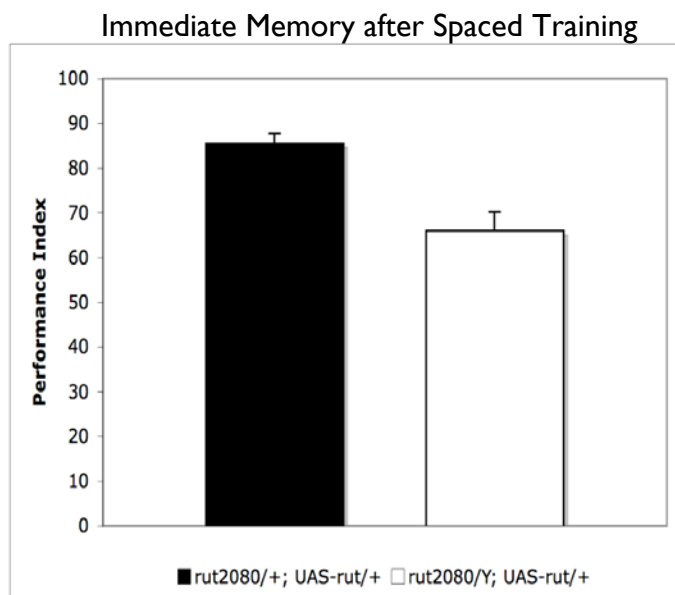



Figure S6

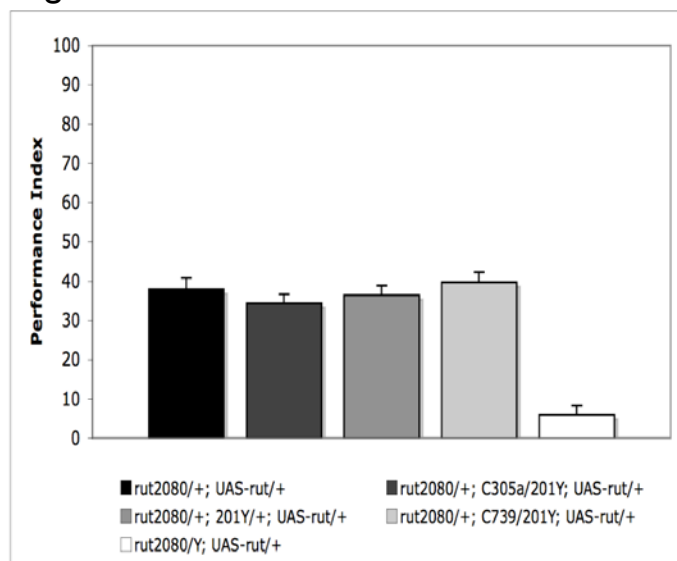

Supplement: NIHMS132108-supplement-01.pdf [file NIHMS132108-supplement-01.pdf]
